# Supplementary material for: Prognostic signature of esophageal adenocarcinoma based on pyroptosis-related genes
Source: PubMed Central journal article supplement (PMC8900411; doi:10.1186/s12920-022-01196-x), 2022-03-07
Supplement: 12920_2022_1196_MOESM9_ESM.pdf [file 12920_2022_1196_MOESM9_ESM.pdf]

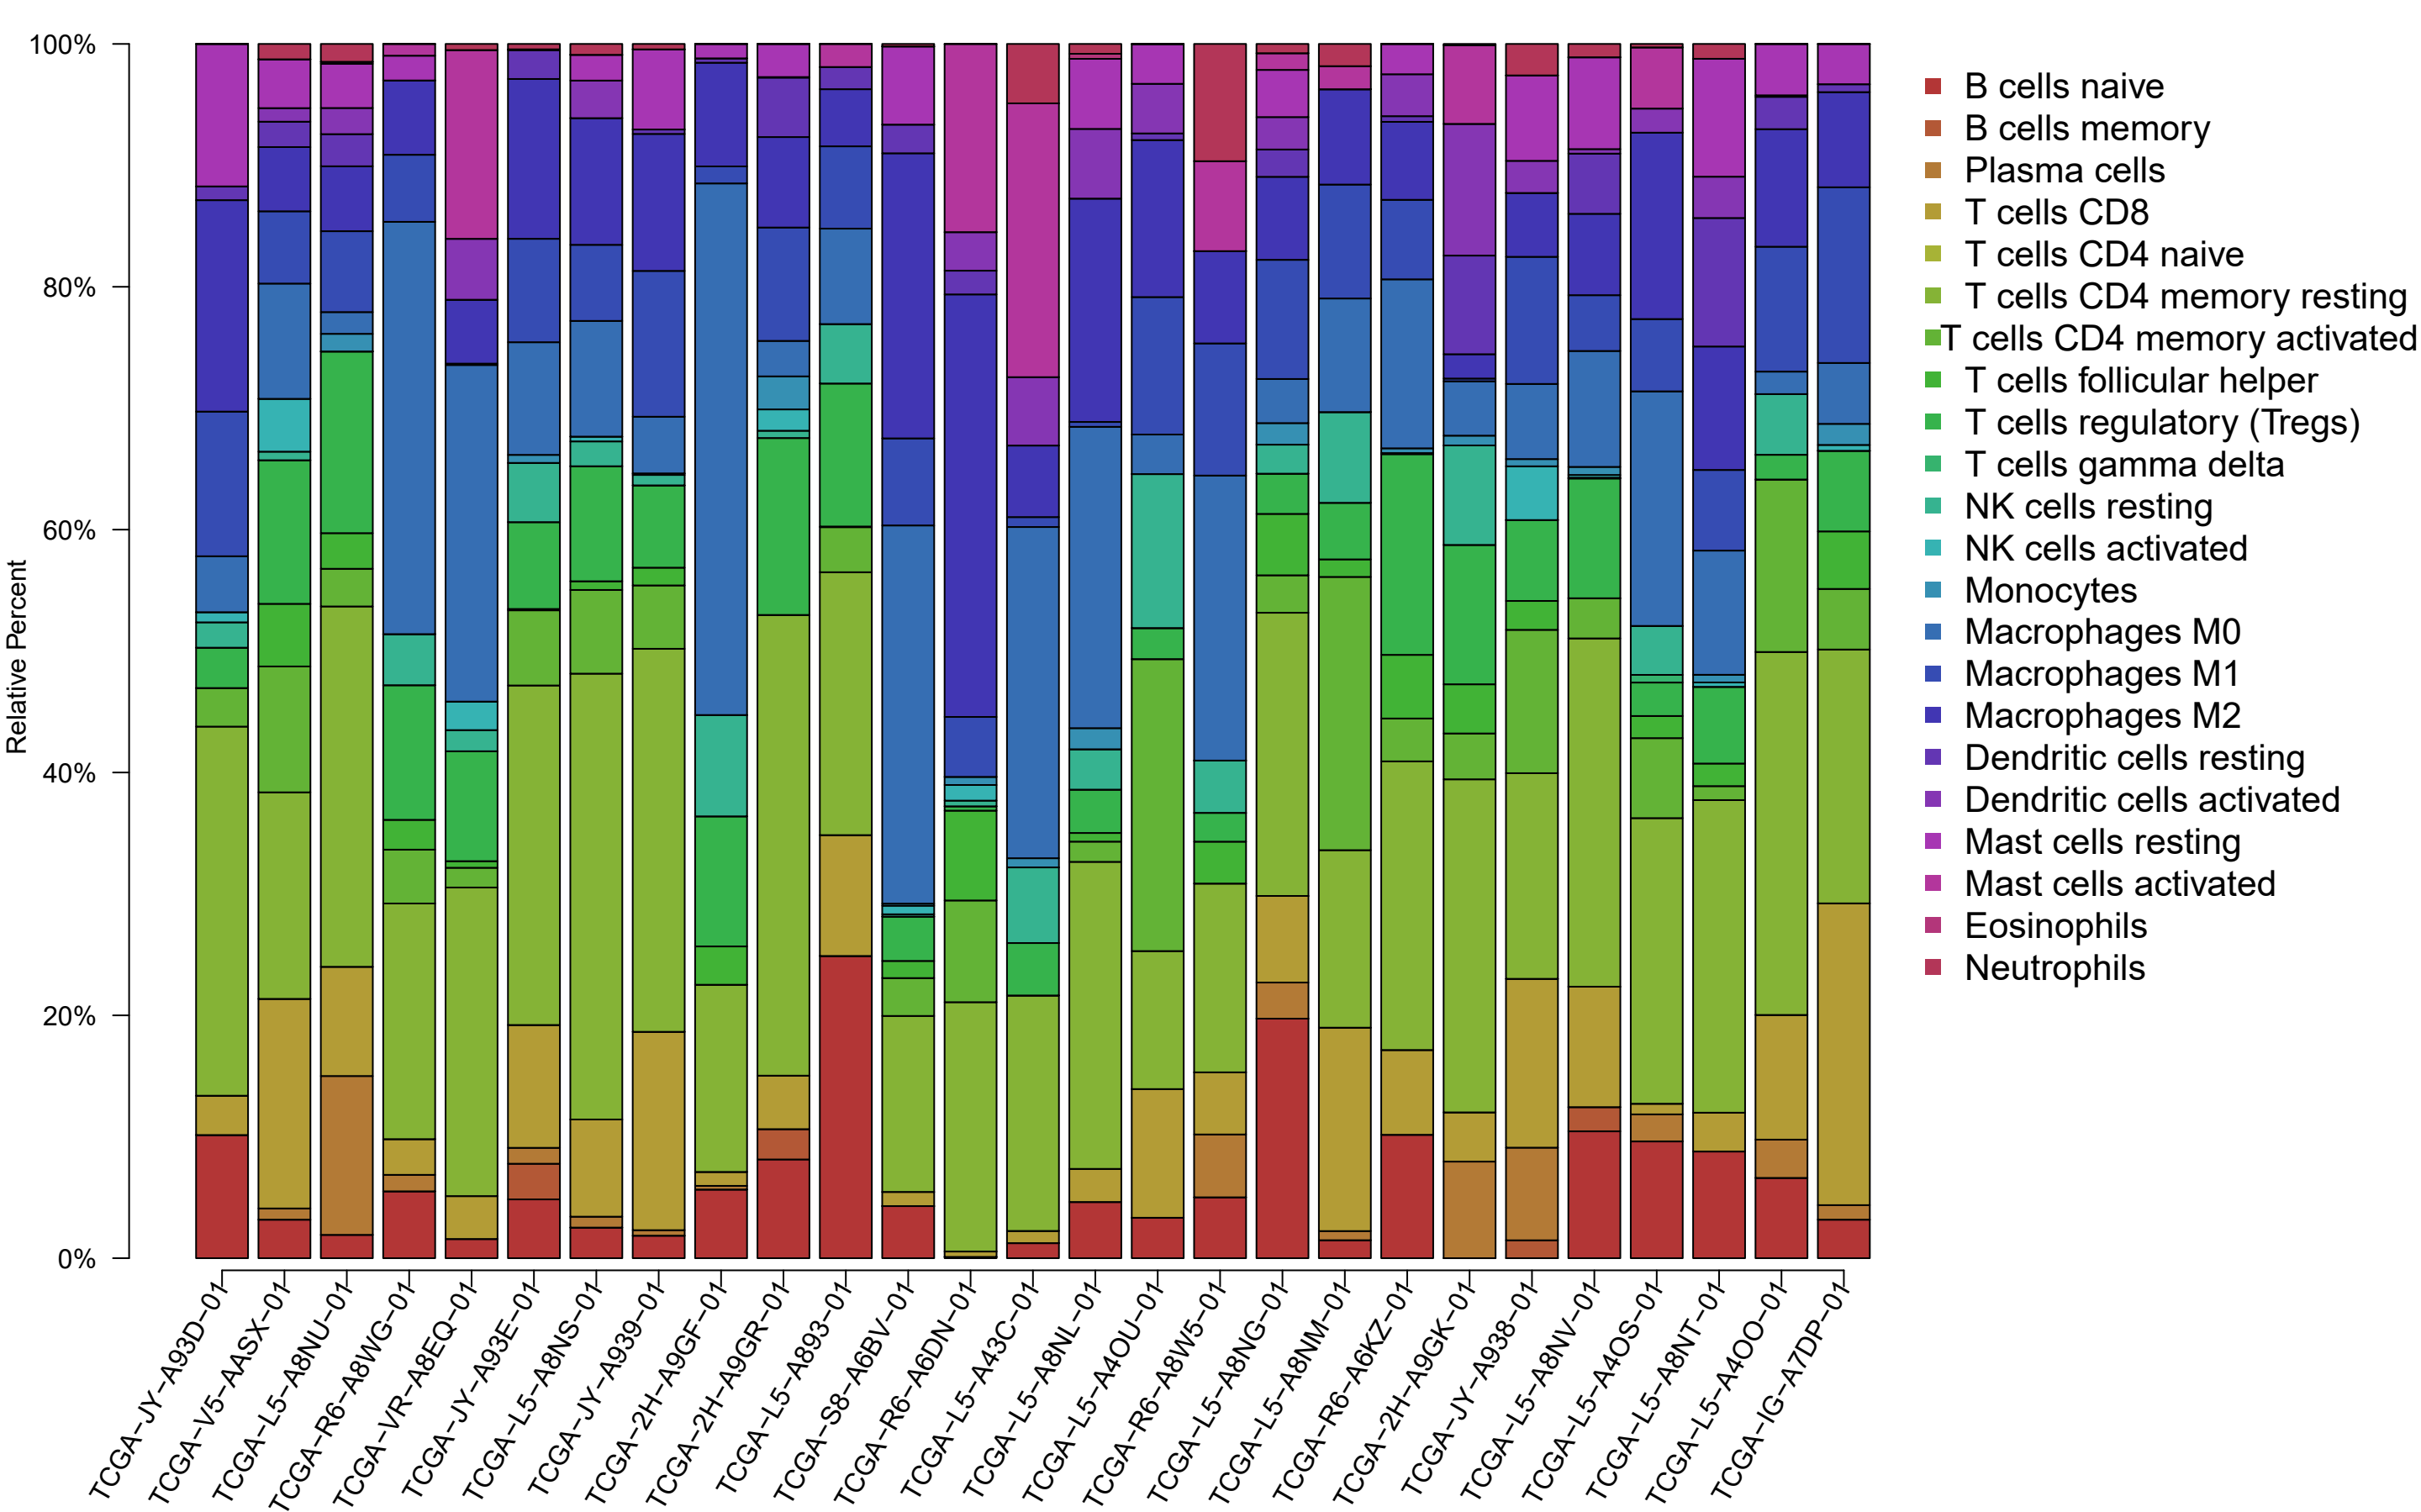

**Additional file 9.** Immune cell infiltration in high-risk and low-risk groups for each sample.
